# Supplementary material for: Single cell RNA sequencing to dissect the molecular heterogeneity in lupus nephritis
Source: JCI journal article supplement (doi:10.1172/jci.insight.93009), 2017-05-03
Supplement: sd1 [file 1]

## Supplementary Materials and Methods

### *Tissue specificity entropy calculation*

RPKM values were provided by the GTEx consortium for 56318 genes across 9647 samples from adipose tissue, adrenal gland, bladder, blood, blood vessel, bone marrow, brain, breast, cervix uteri, colon, esophagus, fallopian tube, heart, kidney, liver, lung, muscle, nerve, ovary, pancreas, pituitary, prostate, salivary gland, skin, small intestine, spleen, stomach, testis, thyroid, uterus, and vagina. The average RPKM for each of the 56318 reference transcripts in each tissue type was computed, resulting in 31 total RPKM values for each gene. All of the 9647 RPKM values for each of the 56318 transcripts were retained as a null distribution of expression values. For each gene then, an entropy value was computed. The entropy value for a gene across tissue types was computed by fitting the 9647 RPKM null distribution values for the gene into a normal distribution. The normal distribution was broken up into 10,000 contiguous ranges to estimate the probability of a value occurring in any of the ranges. The probability ( $p$ ) of observing each of the 31 average RPKM values given the real observed ranges of expression of the gene across all the 9647 samples was computed using the discretized normal distribution constructed above. The entropy of each gene across the 31 tissue types was then was a cumulative  $-p \cdot \ln(p)$  of the probability  $p$  of each of the 31 average RPKM values. RPKM values were converted into TPM.

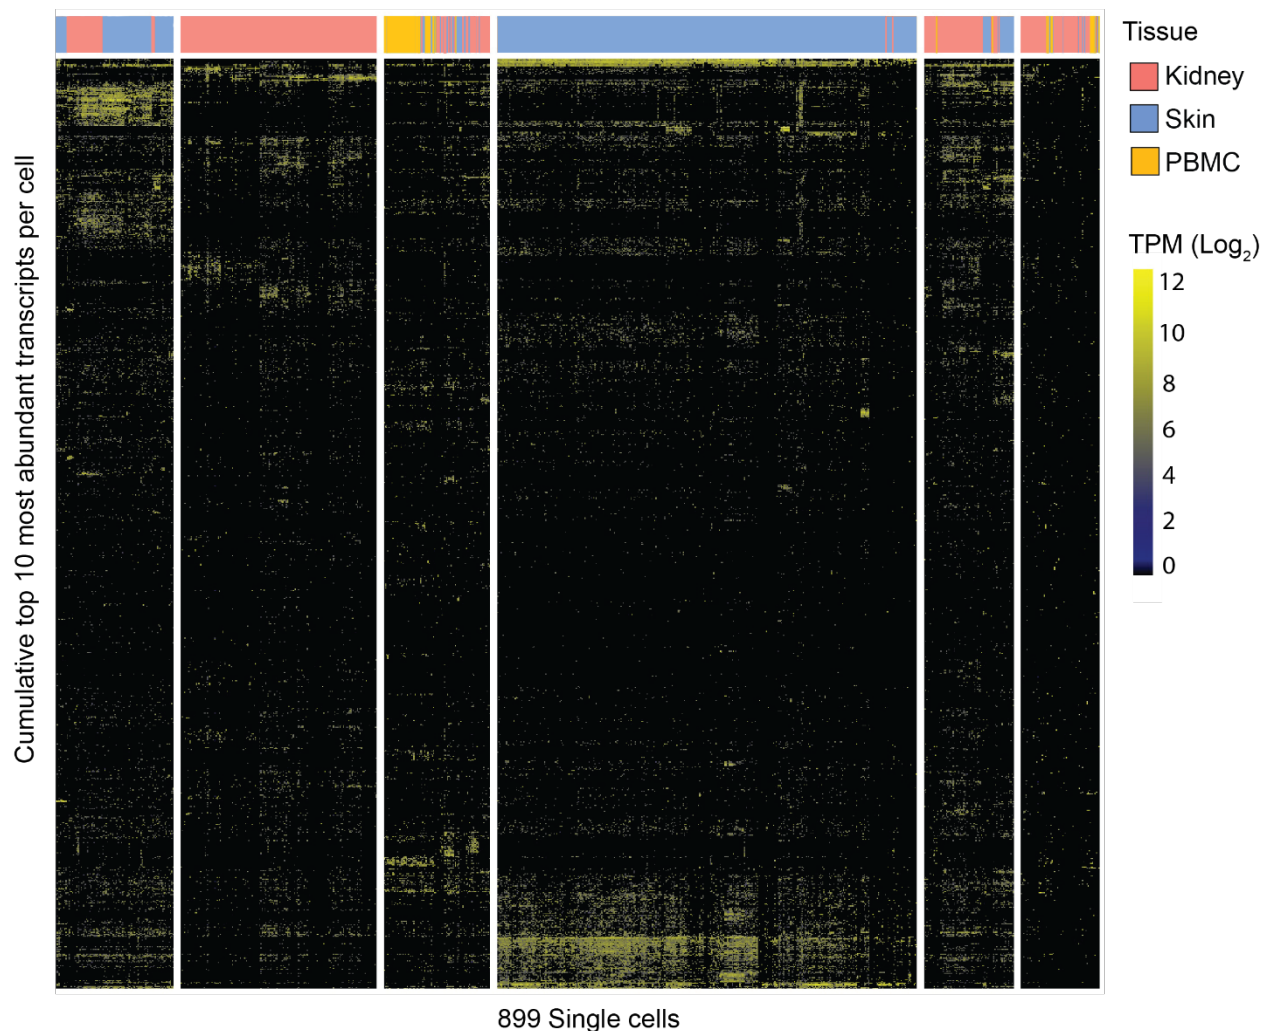

**Supplemental Figure 1.** Unsupervised hierarchical clustering of single-cell datasets from skin, kidney and PBMC. Each column represents a single cell each row a single gene from a cumulative list of the top 10 most abundant transcripts per cell excluding mitochondrially encoded genes, ribosomal proteins, and *HLA* genes.

**Supplemental Table 1.** Kidney-specifically expressed genes absent in scRNA-seq.

| Gene symbol | Kidney GTEx<br>average TPM | Single cell<br>average TPM | Entropy | 3' UTR<br>% GC | 3' UTR<br>length |
|-------------|----------------------------|----------------------------|---------|----------------|------------------|
| REN         | 391.3                      | 0.0                        | 0.7     | 58             | 359              |
| CRYAA       | 303.4                      | 0.0                        | 0.6     | 65             | 735              |
| NPHS2       | 237.0                      | 0.0                        | 0.5     | 46             | 913              |
| SLC9A3      | 161.2                      | 0.0                        | 0.3     | 81             | 73               |
| NPHS1       | 81.6                       | 0.0                        | 0.3     | 53             | 682              |
| CYP27B1     | 75.7                       | 0.0                        | 0.5     | 66             | 201              |
| HOXB8       | 69.4                       | 0.0                        | 0.5     | 56             | 1164             |
| SLC30A2     | 47.9                       | 0.0                        | 0.3     | 57             | 2054             |
| MAPK15      | 38.1                       | 0.0                        | 0.4     | 67             | 384              |
| LBP         | 35.7                       | 0.0                        | 0.3     | 50             | 399              |
| SLC34A3     | 33.2                       | 0.0                        | 0.4     | 68             | 603              |
| CLEC18A     | 29.3                       | 0.0                        | 0.4     | 58             | 775              |

**Supplemental Table 5.** Patient clinical scores.

| METRO<br>patient ID                 | 2634 | 2644 | 5324 | 2726 | 2732  | 5288 | 5563 | 5594  | 5596 | 5552  |
|-------------------------------------|------|------|------|------|-------|------|------|-------|------|-------|
| ISN/RPS Class                       | IV/V | V    | IV   | III  | III/V | V    | III  | IV    | III  | III/V |
| Activity index                      | 0    | 0    | 5    | 3    | 3     | 0    | 2    | 10    | 4    | 2     |
| Chronicity<br>index                 | 2    | 1    | 8    | 1    | 3     | 0    | 2    | 5     | 1    | 1     |
| Glomerular IgG<br>deposition        | 2    | 3    | 3    | 2    | 2     | 2    | 3    | 3     | 3    | 1     |
| Proteinuria                         | N.D. | 1.1  | 6    | 2.3  | 2.4   | 1.4  | 8.41 | 9.065 | 2.35 | 0.76  |
| eGFR<br>(m/min/1.73m <sup>2</sup> ) | >60  | >60  | 34   | >60  | >60   | >60  | >60  | 25.6  | N.D. | >60   |
| IFN response<br>score               | 249  | 250  | 302  | 239  | 221   | 233  | 301  | 258   | 188  | 66    |
